# Supplementary material
Source: HighWire-hosted journal article supplement (https://openres.ersjournals.com/content/7/4/00381-2021)
Supplement: inline-supplementary-material-1 [file inline-supplementary-material-1.pdf]

*Table S1: Overview of clinical trials on biologics in severe asthma which include pediatric/adolescent patients. The following studies were included: RCTs, post-trial follow-up regarding safety, PK studies in pediatrics, and post-hoc analyses of RCTs focusing on adolescent population included in the trial.*

| Reference                  | Treatment          | Study name                                                       | Study population                                                                                    | Number of patients included <18 yrs | Study design                | Duration of treatment | Primary outcome(s)                                                                               |
|----------------------------|--------------------|------------------------------------------------------------------|-----------------------------------------------------------------------------------------------------|-------------------------------------|-----------------------------|-----------------------|--------------------------------------------------------------------------------------------------|
| <b>Milgrom et al. 2001</b> | <b>Omalizumab</b>  | Not specified                                                    | N=334; 6-12 yrs.; Allergic moderate-to-severe allergic asthma                                       | 334                                 | RCT                         | 24 wks                | ICS dose reduction                                                                               |
| <b>Lanier et al. 2009</b>  | Omalizumab         | NCT00079937                                                      | N=576; 6-12 yrs.; uncontrolled moderate-to-severe allergic asthma                                   | 576                                 | RCT                         | 52 wks                | Exacerbation rate                                                                                |
| <b>Kulus et al. 2010</b>   | Omalizumab         | NCT00079937                                                      | N=235; 6-12 yrs.; uncontrolled severe allergic asthma enrolled in NCT00079937                       | 235                                 | Post-hoc analysis           | 52 wks                | Exacerbation rate                                                                                |
| <b>Busse et al. 2011</b>   | Omalizumab         | NCT00377572                                                      | N=419; 6-20 yrs.; moderate-to-severe allergic asthma (uncontrolled)                                 | Not specified                       | RCT                         | 60 wks                | Number of days with asthma symptoms                                                              |
| <b>Busse et al. 2020</b>   | Omalizumab         | 008<br>009<br>011<br>SOLAR<br>INNOVATE<br>ALTO<br>ETOPA<br>EXTRA | N=340; 12-17 yrs, moderate-to-severe allergic asthma. Previously enrolled in other omalizumab RCTs. | 340                                 | Post-hoc analysis of 8 RCTs | 16-53 wks             | Lung function, eosinophil counts                                                                 |
| <b>Pavord et al. 2012</b>  | <b>Mepolizumab</b> | DREAM                                                            | N=621; 12-74 yrs.; severe eosinophilic asthma                                                       | 1                                   | RCT                         | 52 wks                | Exacerbation rate                                                                                |
| <b>Bel et al. 2014</b>     | Mepolizumab        | SIRIUS                                                           | N=135; 16-74 yrs.; severe eosinophilic asthma                                                       | 2                                   | RCT                         | 24 wks                | Reduction of glucocorticoid dose                                                                 |
| <b>Ortega et al. 2014</b>  | Mepolizumab        | MENSA                                                            | N=576; 12-82 yrs.; severe eosinophilic asthma                                                       | 25                                  | RCT                         | 32 wks                | Exacerbation rates                                                                               |
| <b>Lugogo et al. 2016</b>  | Mepolizumab        | MENSA/SIRIUS                                                     | N=651; ≥12 yrs.; severe eosinophilic asthma (participants previously enrolled in MENSA or SIRIUS)   | Not specified (max 27)              | Post-trial follow-up        | 52 wks                | Long-term safety and efficacy: number of AEs; exacerbation rates, durability of response and ACQ |

|                                |                   |                                   |                                                                                                                     |                       |                             |                                |                                                                                                    |
|--------------------------------|-------------------|-----------------------------------|---------------------------------------------------------------------------------------------------------------------|-----------------------|-----------------------------|--------------------------------|----------------------------------------------------------------------------------------------------|
| <b>Chupp et al. 2017</b>       | Mepolizumab       | MUSCA                             | N=556; ≥ 12 yrs.; severe eosinophilic asthma                                                                        | 9                     | RCT                         | 24 wks                         | SGRQ                                                                                               |
| <b>Khatri et al. 2019</b>      | Mepolizumab       | DREAM                             | N=347; 12-74 yrs.; severe eosinophilic asthma (participants previously enrolled in DREAM)                           | Not specified (max 1) | Post-trial follow-up        | 3.5 yrs average (4.5 yrs. max) | Long-term safety (AE; SAE; exacerbation rates; asthma control (ACQ); FEV1; blood eosinophil count) |
| <b>Yancey et al. 2019</b>      | Mepolizumab       | DREAM<br>MENZA<br>SIRIUS<br>MUSCA | N=34; 12-17 yrs.; severe eosinophilic asthma (enrolled in DREAM, MENSA, SIRIUS/MUSCA)                               | 34                    | Post hoc analysis of 4 RCTs | 24 to 52 wks                   | Exacerbation rate                                                                                  |
| <b>Gupta et al. 2019</b>       | Mepolizumab       | NCT02377427                       | N=36; 6-11 yrs.; severe eosinophilic asthma                                                                         | 36                    | PK/PD study                 | 12 wks                         | Pharmacokinetics: mepolizumab clearance<br>Pharmacodynamics: blood eosinophil count                |
| <b>Gupta et al. 2019</b>       | Mepolizumab       | NCT02377427                       | N=30; 6-11 yrs.; severe eosinophilic asthma                                                                         | 30 (                  | Post-trial follow up        | 52 wks                         | Long-term safety: Adverse effects; blood eosinophil count                                          |
| <b>Castro et al., 2018</b>     | <b>Dupilumab</b>  | LIBERTY<br>ASTHMA QUEST           | N=1902 ≥12 yrs; uncontrolled asthma.                                                                                | 107                   | RCT                         | 52 wks                         | Annual exacerbation rate and the absolute change from baseline to wk 12 in FEV1                    |
| <b>Rabe et al., 2018</b>       | Dupilumab         | LIBERTY<br>ASTHMA<br>VENTURE      | N=210, ≥12 yrs; OCS treated asthma.                                                                                 | 3                     | RCT                         | 24 wks                         | % reduction in the glucocorticoid dose                                                             |
| <b>FitzGerald et al., 2016</b> | Benralizumab      | CALIMA                            | N= 1306, 12-75 yrs, severe uncontrolled eosinophilic asthma                                                         | Not specified         | RCT                         | 52 wks                         | Annual exacerbation rate                                                                           |
| <b>Bleecker et al, 2016</b>    | Benralizumab      | SIROCCO                           | N= 1205, 12-75 yrs, severe asthma uncontrolled with high-dosage inhaled corticosteroids and long-acting β2-agonists | Not specified         | RCT                         | 48 wks                         | Annual exacerbation rate                                                                           |
| <b>Castro et al., 2015</b>     | <b>Reslizumab</b> | NCT01287039<br>NCT01285323        | N=953, 12-75 yrs, uncontrolled eosinophilic asthma                                                                  | Not specified         | RCT                         | 52 wks                         | Exacerbations                                                                                      |
| <b>Bjermer et al., 2016</b>    | Reslizumab        | NCT01270464                       | N=315, 12-75 yrs, uncontrolled eosinophilic asthma                                                                  | 15                    | RCT                         | 16 wks                         | FEV1                                                                                               |
| <b>Murphy et al., 2017</b>     | Reslizumab        | NCT01290887                       | N=1052, 12-77 yrs, uncontrolled eosinophilic asthma, previously                                                     | 28                    | Post-trial follow up        | up to 24mth                    | AE, lung function, asthma control                                                                  |

enrolled in NCT0128703,  
NCT01285323 or NCT01270464

*ACQ = Asthma Quality of life Questionnaire, FEV1 = forced expiratory volume in 1 second, FVC = forced vital capacity, FEF25%-75% = forced expiratory flow between 25% and 75% of FVC, IgE = immunoglobulin, ICS = inhaled corticosteroids, OCS = oral corticosteroids, (P)AQLQ = (paediatric) asthma quality of life questionnaire, PEF(R) = peak expiratory flow (rate), QOL = quality of life, (S)AEs = (Severe) Adverse Events, SGQR = St George's Respiratory Questionnaire*

*wk(s) = week(s); mth(s). = month(s); yr(s). = year(s)*

*Table S2: ongoing European initiatives on biologics use in children and adolescents with asthma/allergies*

| Name                                   | Description                                                                                                                                      | Link                                                                           |
|----------------------------------------|--------------------------------------------------------------------------------------------------------------------------------------------------|--------------------------------------------------------------------------------|
| 3TR                                    | <i>Aims to provide fundamental new insights into the mechanisms of response and non-response to treatment.</i>                                   | <a href="https://3tr-imi.eu/">https://3tr-imi.eu/</a>                          |
| ANCHORS                                | <i>Spanish cohort, long-term responses to omalizumab (over 6 years follow-up), with moderate to severe exacerbations as the primary outcomes</i> | Nieto et al. (1)                                                               |
| Danish National Study on Severe Asthma | <i>Identification of patients and cell phenotypes after 1-year course of biologics</i>                                                           |                                                                                |
| German Asthma Net                      | <i>German Severe Asthma Register, aims to identify and differentiate distinct asthma subtypes (includes pediatric data)</i>                      | <a href="https://germanasthmanet.de/">https://germanasthmanet.de/</a>          |
| PERMEABLE                              | <i>Identification of biomarkers to predict responses of pediatric patients to biologics</i>                                                      | <a href="https://www.permeable.eu/">https://www.permeable.eu/</a>              |
| SPACE                                  | <i>ERS Clinical Research Collaboration to collect real-world data on severe pediatric asthma</i>                                                 | Rusconi et al. (3)                                                             |
| TREAT                                  | <i>Pragmatic trial on comparison of the efficacy of mepolizumab vs omalizumab in reducing asthma attacks in children</i>                         | ISRCTN - ISRCTN12109108:<br>Treating severe paediatric asthma: the TREAT trial |

(1) Nieto García A, Garriga-Baraut T, Plaza AM, et al. Omalizumab outcomes for up to 6 years in pediatric patients with severe persistent allergic asthma. *Authorea*. October 29, 2020. DOI: 10.22541/au.160395134.43104166/v1 [*Preprint*]

(2) Lezmi G, Lejeune S, Pin I, et al. Factors associated with asthma severity in children: data from the French COBRAPed Cohort. *J Allergy Clin Immunol Pract*. 2020 Dec 24;S2213-2198(20)31359-3. doi: 10.1016/j.jaip.2020.12.027.

(3) Rusconi F, Fernandez RM, Pijnenburg MWH, et al. The Severe Paediatric Asthma Collaborative in Europe (SPACE) ERS Clinical Research Collaboration: enhancing participation of children with asthma in therapeutic trials of new biologics and receptor blockers. *European Respiratory Journal* 2018 52: 1801665; DOI: 10.1183/13993003.01665-2018
